# Supplementary material
Source: PubMed Central journal article supplement (PMC3501085)
Supplement: supp_M112.396598_jbc.M112.396598-1.pdf [file supp_M112.396598_jbc.M112.396598-1.pdf]

## SUPPLEMENTAL MATERIAL

SUPPLEMENTARY TABLE 1

| Code number <sup>1</sup> | Oligosaccharide <sup>2</sup>                                                             | Purity <sup>3</sup> | Production method <sup>4</sup> | Starting material                | Reference <sup>5</sup>   |
|--------------------------|------------------------------------------------------------------------------------------|---------------------|--------------------------------|----------------------------------|--------------------------|
| 1                        | 6',6'',6'''-trimethyl-(1→4)- $\alpha$ -D-hexagalacturonic acid                           | >99%                | Synthesis                      | D-galactose                      | Clausen <i>et al.</i>    |
| 2                        | 6',6'',6''',6''''-tetramethyl-(1→4)- $\alpha$ -D-hexagalacturonic acid                   | >99%                | Synthesis                      | D-galactose                      | Clausen <i>et al.</i>    |
| 3                        | 6',6''''-dimethyl-(1→4)- $\alpha$ -D-hexagalacturonic acid                               | >99%                | Synthesis                      | D-galactose                      | Clausen <i>et al.</i>    |
| 4                        | 6',6'',6'''-trimethyl-(1→4)- $\alpha$ -D-hexagalacturonic acid                           | >99%                | Synthesis                      | D-galactose                      | Clausen <i>et al.</i>    |
| 5                        | 6,6''''',6''''''-trimethyl-(1→4)- $\alpha$ -D-hexagalacturonic acid                      | >99%                | Synthesis                      | D-galactose                      | Clausen <i>et al.</i>    |
| 6                        | (1→4)- $\alpha$ -D-hexagalacturonic acid                                                 | >99%                | Synthesis                      | D-galactose                      | Clausen, M.H.            |
| 7                        | 4''''''-(4,5-anhydro- $\alpha$ -D-galacturonyl)-(1→4)- $\alpha$ -D-octagalacturonic acid | >99%                | Enz. F.&P.                     | Polygalacturonic acid, lime      | Guillaumie <i>et al.</i> |
| 8                        | (1→5)- $\alpha$ -L-arabinobiose                                                          | ~95%                | Enz. F.&P.                     | de-branched arabinan, sugar beet | Megazyme                 |
| 9                        | (1→5)- $\alpha$ -L-arabinotriose                                                         | ~95%                | Enz. F.&P.                     | de-branched arabinan, sugar beet | Megazyme                 |
| 10                       | (1→5)- $\alpha$ -L-arabinotetraose                                                       | ~95%                | Enz. F.&P.                     | de-branched arabinan, sugar beet | Megazyme                 |
| 11                       | (1→5)- $\alpha$ -L-arabinopentaose                                                       | ~95%                | Enz. F.&P.                     | de-branched arabinan, sugar beet | Megazyme                 |
| 12                       | (1→5)- $\alpha$ -L-arabinohexaose                                                        | ~95%                | Enz. F.&P.                     | de-branched arabinan, sugar beet | Megazyme                 |
| 13                       | (1→5)- $\alpha$ -L-arabinoheptaose                                                       | ~95%                | Enz. F.&P.                     | de-branched arabinan, sugar beet | Megazyme                 |
| 14                       | (1→5)- $\alpha$ -L-arabinooctaose                                                        | ~95%                | Enz. F.&P.                     | de-branched arabinan, sugar beet | Megazyme                 |
| 15                       | 2'-E-feruloylyl- $\alpha$ -(1→5)-L-arabinofuranobiose                                    | >98%                | Enz. F.&P.                     | Sugar beet pulp                  | Ralet <i>et al</i> 1994  |
| 16                       | 2'-E-feruloylyl- $\alpha$ -(1→5)-L-arabinofuranotriose                                   | >98%                | Enz. F.&P.                     | Sugar beet pulp                  | Ralet <i>et al</i> 1994  |
| 17                       | D-galactose                                                                              | >99%                | na                             | na                               | Sigma-Aldrich            |
| 18                       | (1→4)- $\beta$ -D-galactobiose                                                           | ~90%                | Enz. F.&P.                     | Galactan                         | Megazyme                 |
| 19                       | (1→4)- $\beta$ -D-galactotetraose                                                        | >99%                | Synthesis                      | D-galactose                      | Clausen, M. H.           |
| 20                       | 6'- $\alpha$ -D-galactosyl-(1→4)- $\beta$ -D-galactotriose                               | >99%                | Synthesis                      | D-galactose                      | Clausen, M. H.           |
| 21                       | 6'- $\beta$ -D-galactosyl-(1→4)- $\beta$ -D-galactotriose                                | >99%                | Synthesis                      | D-galactose                      | Clausen, M. H.           |
| 22                       | 4',6'- $\alpha$ -D-digalactosyl-(1→4)- $\beta$ -D-galactobiose                           | >99%                | Synthesis                      | D-galactose                      | Clausen, M. H.           |
| 23                       | $\beta$ -D-galactosyl-(1→4)-D-glucose (lactose, milk sugar)                              | >99%                | na                             | na                               | Sigma-Aldrich            |
| 24                       | 6'-E-feruloylyl-(1→4)- $\beta$ -D-galactobiose                                           | >98%                | Enz. F.&P.                     | Sugar beet galactan              | Ralet <i>et al</i> 1994  |
| 25                       | D-Mannose                                                                                | >99%                | na                             | na                               | Sigma-Aldrich            |

Oligosaccharide microarrays for plant glycobiology

|    |                                                                  |        |              |                      |                          |
|----|------------------------------------------------------------------|--------|--------------|----------------------|--------------------------|
| 26 | (1→4)-β-D-mannobiose                                             | ~95%   | Enz. F.&P.   | Mannan               | Megazyme                 |
| 27 | (1→4)-β-D-mannotriose                                            | ~95%   | Enz. F.&P.   | Mannan               | Megazyme                 |
| 28 | (1→4)-β-D-mannotetraose                                          | ~95%   | Enz. F.&P.   | Mannan               | Megazyme                 |
| 29 | (1→4)-β-D-mannopentaose                                          | >95%   | Enz. F.&P.   | Mannan               | Megazyme                 |
| 30 | (1→4)-β-D-mannohexaose                                           | >95%   | Enz. F.&P.   | Mannan               | Megazyme                 |
| 31 | 6-α-D-galactosyl- (1→4)-β-D-mannobiose                           | ~95%   | Enz. F.&P.   | galactomannan, carob | Megazyme                 |
| 32 | 6-α-D-galactosyl- (1→4)-β-D-mannotriose                          | >95%   | Enz. F.&P.   | galactomannan, carob | Megazyme                 |
| 33 | Galman VF                                                        | ~95%   | Enz. F.&P.   | galactomannan, carob | Farkas, V.               |
| 34 | 6'',6'''-α-D-digalactosyl- (1→4)-β-D-mannopentaose               | ~95%   | Enz. F.&P.   | galactomannan, carob | Megazyme                 |
| 35 | Glcman 1                                                         | ~95%   | Enz. F.&P.   | Konjac               | Farkas, V.               |
| 36 | Glcman 2                                                         | ~95%   | Enz. F.&P.   | Barley               | Farkas, V.               |
| 37 | (1→4)-β-D-xylobiose                                              | >95%   | A.hyd. F.&P. | arabinoxylan         | Megazyme                 |
| 38 | (1→4)-β-D-xylotriase                                             | >95%   | A.hyd. F.&P. | arabinoxylan         | Megazyme                 |
| 39 | (1→4)-β-D-xylotetraose                                           | >95%   | A.hyd. F.&P. | arabinoxylan         | Megazyme                 |
| 40 | (1→4)-β-D-xylopentaose                                           | >95%   | A.hyd. F.&P. | arabinoxylan         | Megazyme                 |
| 41 | (1→4)-β-D-xylohexaose                                            | >95%   | A.hyd. F.&P. | arabinoxylan         | Megazyme                 |
| 42 | D-glucoronyl-α-(1→2)-[(1→4)-β-D-xylotriase]<br>(aldouronic acid) | ~95%   | Enz. F.&P.   | arabinoxylan         | Megazyme                 |
| 43 | L-arabinosyl-α-(1→2)-[(1→4)-β-D-xylobiose]                       | ~95%   | Enz. F.&P.   | Xyloglucan           | Megazyme                 |
| 44 | β-D-xylosyl-(1→6)-D-glucose (isoprimeverose)                     | ~95%   | Enz. F.&P.   | Xyloglucan           | Megazyme                 |
| 45 | β-X-(1→4)-β-X-(1→4)-β-X-(1→4)-G (xyloglucan heptamer)            | ~90%   | Enz. F.&P.   | Xyloglucan           | Megaxyme                 |
| 46 | β-X-(1→4)-β-L-(1→4)-β-X-(1→4)-G (xyloglucan octamer)             | ~90%   | Enz. F.&P.   | Xyloglucan           | Farkas & Maclachlan 1988 |
| 47 | β-L-(1→4)-β-L-(1→4)-β-X-(1→4)-G (xyloglucan nonamer)             | ~90%   | Enz. F.&P.   | Xyloglucan           | Farkas & Maclachlan 1988 |
| 48 | XXXGXXXG                                                         | ~80%   | Enz. F.&P.   | Xyloglucan           | Megazyme                 |
| 49 | D-glucose                                                        | >99.5% | na           | Biomass              | Sigma-Aldrich            |
| 50 | (1→4)-β-D-glucobiose (cellobiose)                                | ≥98%   | na           | na                   | Sigma-Aldrich            |
| 51 | (1→4)-β-D-glucotriose (cellotriose)                              | ~95%   | A.hyd. F.&P. | Cellulose acetate    | Megazyme                 |
| 52 | (1→4)-β-D-glucotetraose (cellotetraose)                          | ~95%   | A.hyd. F.&P. | Cellulose acetate    | Megazyme                 |
| 53 | (1→4)-β-D-glucopentaose (cellopentaose)                          | ~94%   | A.hyd. F.&P. | Cellulose acetate    | Megazyme                 |
| 54 | (1→4)-β-D-glucohexaose (cellohexaose)                            | ~94%   | A.hyd. F.&P. | Cellulose acetate    | Megazyme                 |
| 55 | (1→3)-β-D-glucobiose (laminaribiose)                             | ~95%   | A.hyd. F.&P. | Curdlan              | Megazyme                 |
| 56 | (1→3)-β-D-glucotriose (laminaritriose)                           | ~95%   | A.hyd. F.&P. | Curdlan              | Megazyme                 |
| 57 | (1→3)-β-D-glucotetraose (laminaritetraose)                       | ~95%   | A.hyd. F.&P. | Curdlan              | Megazyme                 |
| 58 | (1→3)-β-D-glucopentaose (laminaripentaose)                       | ~95%   | A.hyd. F.&P. | Curdlan              | Megazyme                 |
| 59 | (1→3)-β-D-glucohexaose (laminarihexaose)                         | ~95%   | A.hyd. F.&P. | Curdlan              | Megazyme                 |
| 60 | 3 <sup>β</sup> -β-D-glucosyl- (1→4)-β-D-glucobiose               | >95%   | Enz. F.&P.   | β-glucan (barley)    | Megazyme                 |
| 61 | 4 <sup>β</sup> -β-D-glucosyl- (1→3)-β-D-glucobiose               | 95%    | Enz. F.&P.   | β-glucan (barley)    | Megazyme                 |
| 62 | 3 <sup>β</sup> -β-D-glucosyl- (1→4)-β-D-glucotriose              | ~90%   | Enz. F.&P.   | β-glucan (barley)    | Megazyme                 |
| 63 | 3-β-[(1→4)-β-D-glucotriosyl]-D-glucose                           | 95%    | Enz. F.&P.   | β-glucan (barley)    | Megazyme                 |
| 64 | 3 <sup>β</sup> -β-[(1→4)-β-D-glucobiosyl]- (1→4)-β-D-glucobiose  | ~90%   | Enz. F.&P.   | β-glucan (barley)    | Megazyme                 |
| 65 | Mlg5a                                                            | ~90%   | Enz. F.&P.   | β-glucan (barley)    | Megazyme                 |

|    |                                                                                                                                                                       |            |                  |                          |                       |
|----|-----------------------------------------------------------------------------------------------------------------------------------------------------------------------|------------|------------------|--------------------------|-----------------------|
| 66 | Mlg6a                                                                                                                                                                 | ~90%       | Enz. F.&P.       | $\beta$ -glucan (barley) | Megazyme              |
| 67 | (1 $\rightarrow$ 4)- $\alpha$ -D-glucobiose (maltose)                                                                                                                 | $\geq$ 98% | na               | Potato                   | Sigma-Aldrich         |
| 68 | (1 $\rightarrow$ 4)- $\alpha$ -D-glucotriose (maltotriose)                                                                                                            | 95%        | na               | na                       | Sigma-Aldrich         |
| 69 | (1 $\rightarrow$ 4)- $\alpha$ -D-glucohexaose (maltohexaose)                                                                                                          | $\geq$ 98% | na               | na                       | Sigma-Aldrich         |
| 70 | 6''- $\alpha$ -D-glucosyl- (1 $\rightarrow$ 4)- $\alpha$ -D-glucotriose                                                                                               | ~95%       | Enz. F.&P.       | Pullulan                 | Megazyme              |
| 71 | 6''- $\alpha$ -{6** $\alpha$ -D-glucosyl-[(1 $\rightarrow$ 4)- $\alpha$ -D-glucotriosyl]}-(1 $\rightarrow$ 4)- $\alpha$ -D-glucotriose                                | ~95%       | Enz. F.&P.       | Pullulan                 | Megazyme              |
| 72 | 6',6'''' $\alpha$ -di-[(1 $\rightarrow$ 4)- $\alpha$ -D-glucobiosyl]- (1 $\rightarrow$ 4)- $\alpha$ -D-glucohexaose                                                   | >99%       | Synthesis        | D-glucose                | Damager <i>et al.</i> |
| 73 | N-Acetyl-2-deoxy-2-amino-D-glucose                                                                                                                                    | >95%       | na               | na                       | Sigma-Aldrich         |
| 74 | N,N'-diacetyl-2,2'-dideoxy-2,2'-diamino- (1 $\rightarrow$ 4)- $\beta$ -D-glucobiose                                                                                   | ~95%       | Acid hydrol/frac | Chitin                   | Megazyme              |
| 75 | N,N',N''-triacyethyl-2,2',2''-trideoxy-2,2',2''-triamino- (1 $\rightarrow$ 4)- $\beta$ -D-glucotriose                                                                 | ~95%       | Acid hydrol/frac | Chitin                   | Megazyme              |
| 76 | N,N',N'',N'''-tetraacyethyl-2,2',2'',2'''-tetradeoxy-2,2',2'',2'''-tetraamino- (1 $\rightarrow$ 4)- $\beta$ -D-gluco-tetraose                                         | ~95%       | Acid hydrol/frac | Chitin                   | Megazyme              |
| 77 | N,N',N'',N''',N''''-pentaacyethyl-2,2',2'',2''',2''''-pentadeoxy-2,2',2'',2''',2''''-pentaamino- (1 $\rightarrow$ 4)- $\beta$ -D-gluco-pentaose                       | ~95%       | Acid hydrol/frac | Chitin                   | Megazyme              |
| 78 | N,N',N'',N''',N''''',N''''''-hexaacyethyl-2,2',2'',2''',2''''',2''''''-hexadeoxy-2,2',2'',2''',2''''',2''''''-hexaamino- (1 $\rightarrow$ 4)- $\beta$ -D-glucohexaose | ~95%       | Acid hydrol/frac | Chitin                   | Megazyme              |

<sup>1</sup> Oligosaccharides are numbered according to figure 2. <sup>2</sup> Oligosaccharide name refers to the structure of the unconjugated glycan i.e. the reducing end sugar residue is intact. <sup>3</sup> Purities are determined by the suppliers and are approximate percentages. Production methods: Synthesis, chemical synthesis from monosaccharides; Enz. F.&P, enzymatic digestion followed by fractionation and purification; A.hyd. F.&P., acidic hydrolysis followed by fractionation and purification; na, data not available.

SUPPLEMENTARY TABLE 2

| Conjugate no (see Table S1) | Mass of the oligosaccharide (g/mol) | Mass of the conjugate (m/z) | Average no. of residues on BSA |
|-----------------------------|-------------------------------------|-----------------------------|--------------------------------|
| 42                          | 511.23                              | 69,078.9                    | 4.67                           |
| 10                          | 546.56                              | 71070.6                     | 8.01                           |
| 14                          | 1075,20                             | 73099.1                     | 5.96                           |
| 52                          | 666.58                              | 74843.4                     | 12.23                          |
| 54                          | 828.72                              | 79909.4                     | 15.95                          |
| 76                          | 830.80                              | 69035.6                     | 2.82                           |
| 18                          | 342.30                              | 69567.7                     | 8.40                           |
| 32                          | 666.58                              | 71927.0                     | 7.85                           |
| 57                          | 666.58                              | 67798.9                     | 1.66                           |
| 67                          | 342.30                              | 71672.3                     | 14.54                          |
| -                           | 513.23                              | 70577.7                     | 7,57                           |
| 70                          | 666.58                              | 73033.4                     | 9.51                           |
| 69                          | 828.72                              | 78212.2                     | 13.90                          |
| 72                          | 1639,44                             | 69938.9                     | 1.98                           |
| 63                          | 666.58                              | 69037.1                     | 3.52                           |
| 28                          | 666.58                              | 72060.6                     | 8.05                           |
| 30                          | 828.72                              | 73395.0                     | 8.09                           |
| 39                          | 546.56                              | 72614.9                     | 10.83                          |
| 45                          | 1061.92                             | 82198.2                     | 14.60                          |
| 48                          | 2105.82                             | 68557,7                     | 0.89*                          |

## SUPPLEMENTARY FIGURE LEGENDS

**SUPPLEMENTARY FIGURE 1.** Microarray layout and handling. **(A)** A typical oligosaccharide microarray printed using a piezoelectric robot onto a 16-pad nitrocellulose-coated glass slide. Each of the 16 pads is 6 x 6 mm and can accommodate approximately at least 324 spots. Typically, each oligosaccharide is represented by 4 spots (two replicates of two concentrations). **(B)** Multi-chamber incubation equipment is crucial for high throughput analysis. In this example, 64 arrays can be probed separately and simultaneously. **(C)** A composite image showing five identical arrays with the layout shown in **(A)** and probed with five monoclonal antibodies (mAbs): mAb LM6 (anti-(1→5)- $\alpha$ -L-arabinan); mAb LM10 (anti-(1→4)- $\beta$ -D-xylan); mAb LM15 (anti-xyloglucan); mAb LM24 (anti-xyloglucan); mAb BS-400-2 (anti-(1→3)- $\beta$ -D-glucan).

**SUPPLEMENTARY FIGURE 2.** Competitive inhibition studies. The binding of selected monoclonal antibodies (mAbs) and carbohydrate binding modules (CBMs) to selected oligosaccharides was tested by competitive inhibition binding studies in which microarrays were probed with in the presence of un-conjugated oligosaccharides. **(A)** Examples of competitive microarray assays. Binding of the xylan-binding CBM4-2 and the anti-AGP mAb LM14 to immobilized glycan were inhibited by 2 mg-mL (1→4)- $\beta$ -D-glucotetraose (structure 52) and glucuronyl- (1→2)- $\alpha$ -[ (1→4)- $\beta$ -D-xylotriose] (Structure 42) respectively, whilst LM14 binding was not inhibited by (1→4)- $\beta$ -D-xylotetraose. **(B)** Heatmap showing the inhibitory effects of several haptens used from 0 to 10 mg/mL on the binding of mAbs LM14, LM21 (anti-mannan) and LM22 (anti-mannan/galactomannan). The structures of haptens and immobilised glycans are as listed in **Supplementary Table 1**.

Supplemental Figure S1

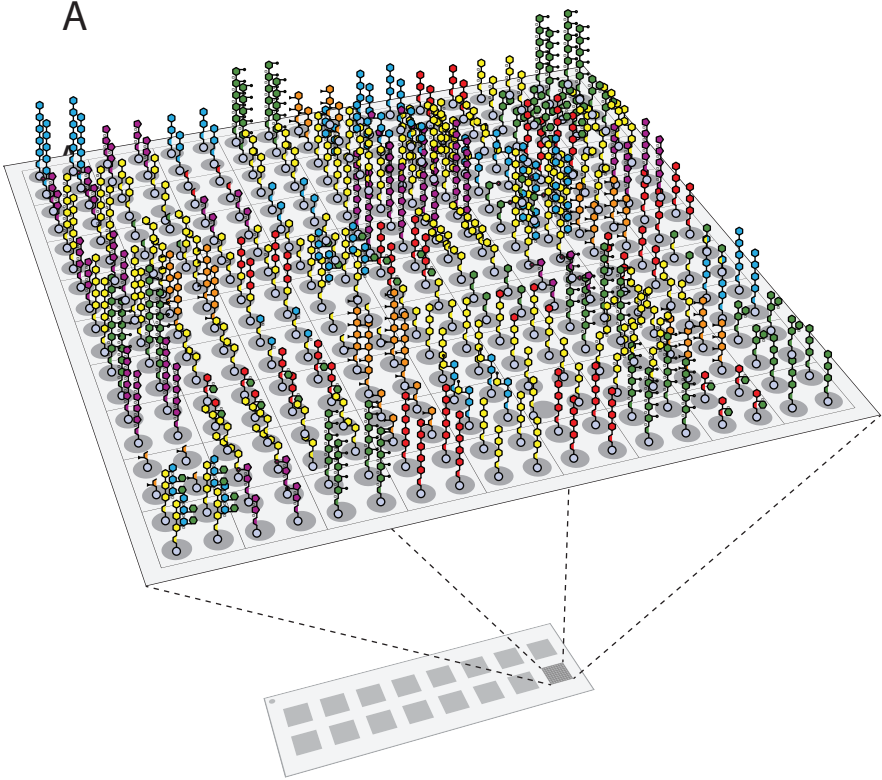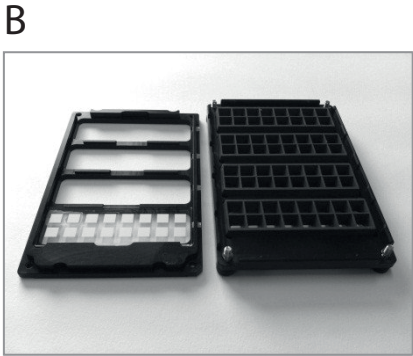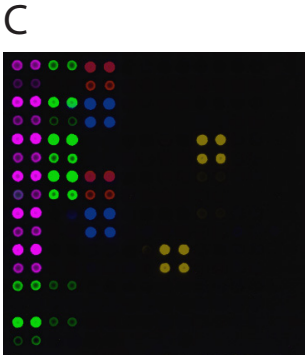

Supplemental Figure S2

A

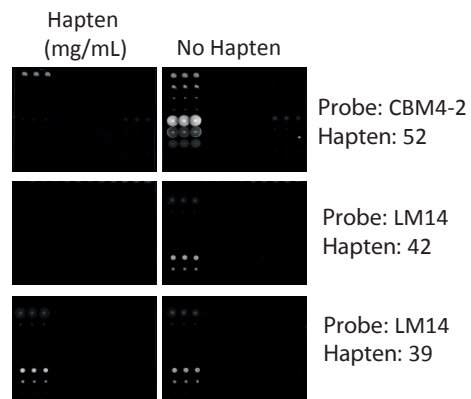

B

| Hapten concentration (mg/ml) |    |     |      |    | Hapten | Immob. glycan | Probe  |
|------------------------------|----|-----|------|----|--------|---------------|--------|
| 10                           | 2  | 0,4 | 0,08 | 0  |        |               |        |
| 76                           | 88 | 100 | 93   | 90 | 39     | 42            | LM14   |
| 5                            | 6  | 34  | 65   | 90 | 42     | 42            | LM14   |
| 19                           | 18 | 31  | 39   | 59 | 30     | 30            | LM21   |
| 24                           | 30 | 43  | 55   | 76 | 32     | 30            | LM21   |
| 21                           | 30 | 57  | 73   | 85 | 34     | 32            | LM22   |
| 9                            | 13 | 16  | 22   | 48 | 32     | 32            | LM22   |
| 25                           | 37 | 56  | 68   | 97 | 28     | 32            | LM22   |
| 22                           | 33 | 45  | 62   | 94 | 30     | 32            | LM22   |
| 1                            | 1  | 1   | 2    | 70 | 41     | 39            | CBM4-2 |
| 0                            | 0  | 3   | 13   | 70 | 41     | 62            | CBM4-2 |
